# Supplementary material
Source: PubMed Central journal article supplement (PMC4334233)
Supplement: ar500390e_si_001.pdf [file ar500390e_si_001.pdf]

## Supporting Information

### Perspectives on Electrostatics and Conformational Motions in Enzyme Catalysis

Philip Hanoian,<sup>†</sup> C. Tony Liu,<sup>†</sup> Sharon Hammes-Schiffer,<sup>‡</sup> and Stephen Benkovic<sup>†</sup>

<sup>†</sup>*Department of Chemistry, Pennsylvania State University, University Park, Pennsylvania 16802,  
United States*

<sup>‡</sup>*Department of Chemistry, University of Illinois at Urbana-Champaign, Urbana, Illinois 61801,  
United States*

## M20C-CN and L28C-CN Probes

The main paper discusses two vibrational SCN probes (M20C-CN and L28C-CN) in Figure 4 of the main text that were not present in our previous publication on nitrile probes within the active site of DHFR (Ref. 10 of the main text). These data were obtained using analogous procedures and identical instrumentation to those of the original publication. The frequencies of maximum absorbance for all four probes in each of the five states along the DHFR catalytic cycle are provided in Table S1 below.

**Table S1.** Frequencies of maximum absorbance for SCN probes incorporated at four positions within the DHFR active site for five states along the catalytic cycle.

| Ligands                  | Frequency of Maximum Absorbance ( $\nu_{\max}$ , $\text{cm}^{-1}$ ) |         |         |         |
|--------------------------|---------------------------------------------------------------------|---------|---------|---------|
|                          | M20C-CN                                                             | L28C-CN | T46C-CN | L54C-CN |
| E:NADP <sup>+</sup> :FOL | 2164.7                                                              | 2160.4  | 2164.0  | 2162.1  |
| E:NADP <sup>+</sup> :THF | 2156.3                                                              | 2160.6  | 2159.9  | 2161.1  |
| E:THF                    | 2158.7                                                              | 2159.9  | 2161.1  | 2160.9  |
| E:NADPH:THF              | 2156.3                                                              | 2160.9  | 2162.6  | 2160.6  |
| E:NADPH                  | 2161.3                                                              | 2163.3  | 2168.1  | 2159.7  |
